# Supplementary material for: A highly sensitive and selective fluorescent sensor for Al3+ ions based on thiophene-2-carboxylic acid hydrazide Schiff base
Source: Royal Society of Chemistry journal article supplement (doi:10.1039/c3ra41573b), 2013-01-01

Electronic Supplementary Material (ESI) for RSC Advances  
This journal is © The Royal Society of Chemistry 2013

## Supplementary Information

### A highly sensitive and selective fluorescent sensor for $\text{Al}^{3+}$ ions based on thiophene 2-carboxylic acid hydrazide Schiff base

Karishma Tiwari, Monika Mishra and Vinod P. Singh\*

*Department of Chemistry, Faculty of Science, Banaras Hindu University, Varanasi, Uttar Pradesh  
221005, India*

**Figure 1:** IR spectra of THN.

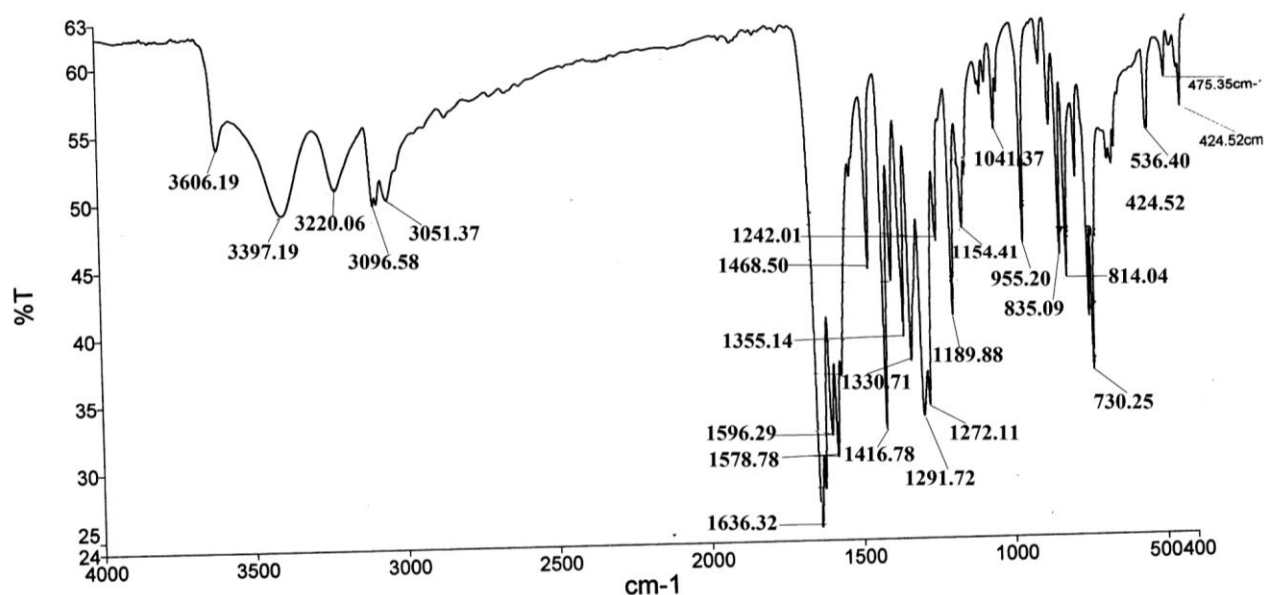

Electronic Supplementary Material (ESI) for RSC Advances  
This journal is © The Royal Society of Chemistry 2013

**Figure 2:**  $^1\text{H}$  NMR spectra of THN in  $\text{DMSO-d}_6$ .

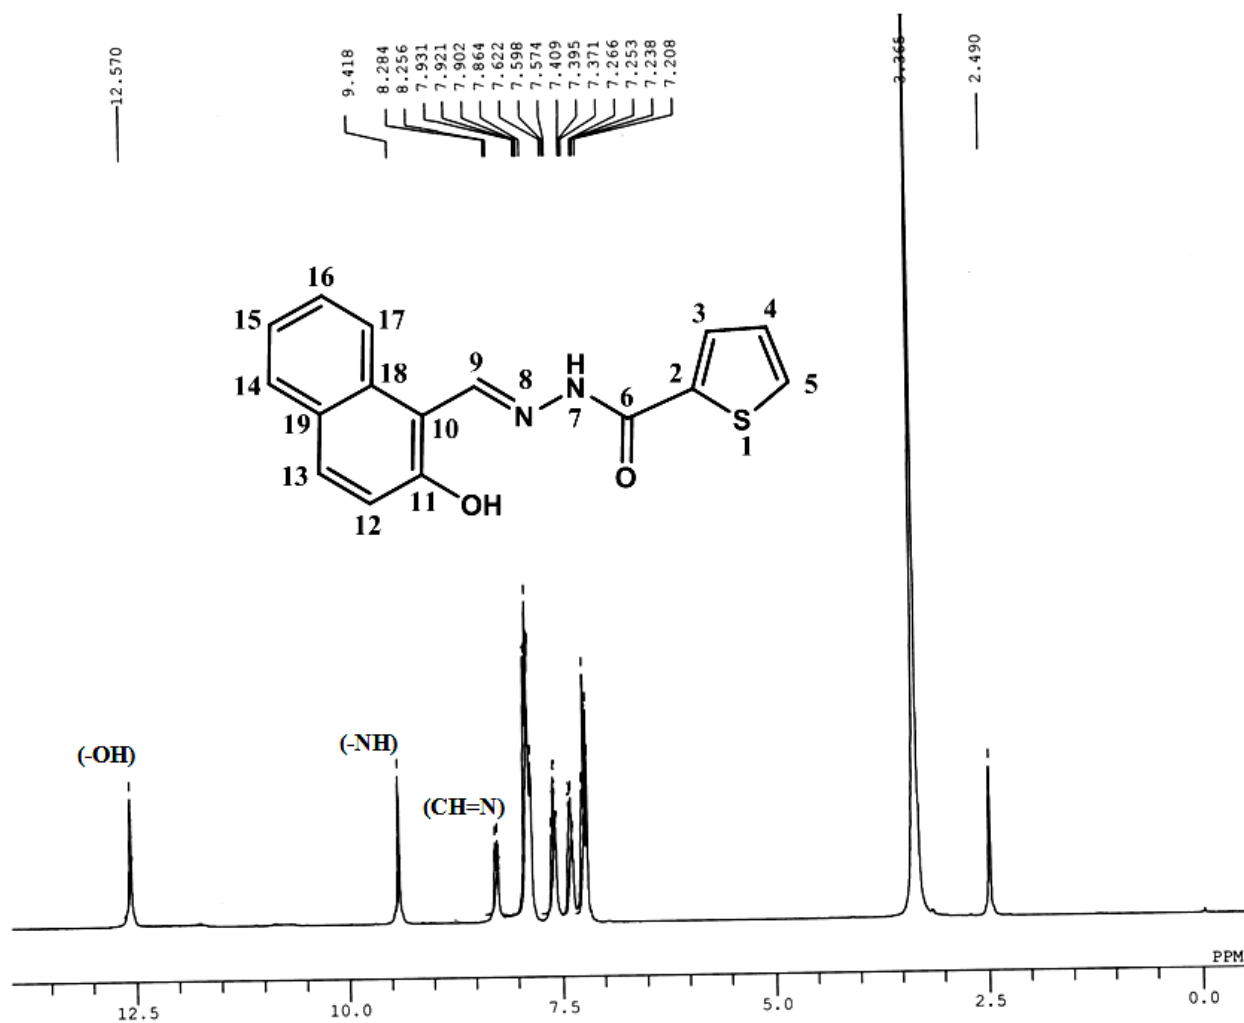

Electronic Supplementary Material (ESI) for RSC Advances  
This journal is © The Royal Society of Chemistry 2013

**Figure 3:**  $^{13}\text{C}$  NMR spectra of THN in  $\text{DMSO-d}_6$ .

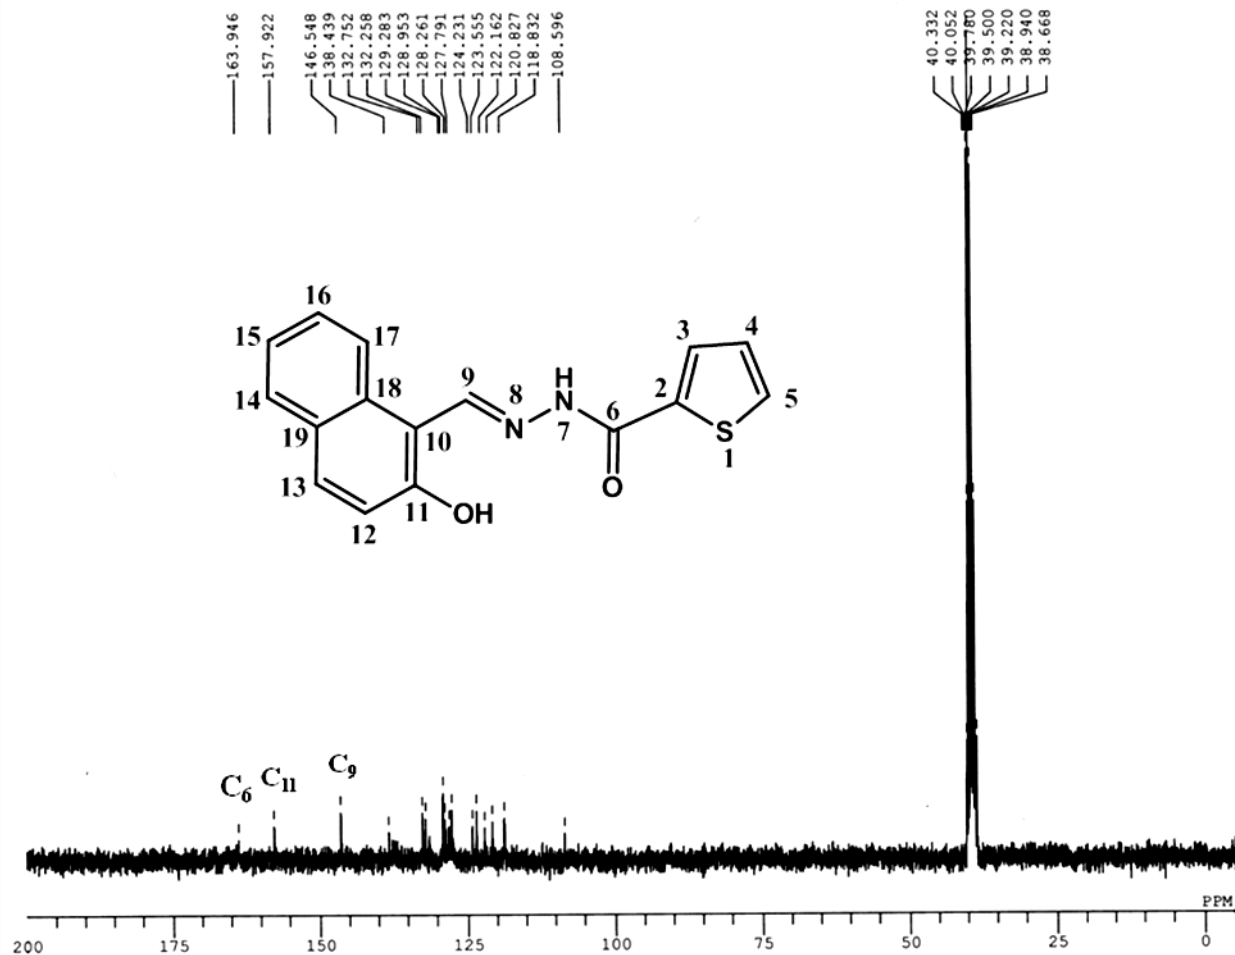

Electronic Supplementary Material (ESI) for RSC Advances  
This journal is © The Royal Society of Chemistry 2013

**Figure 4:** Mass spectra of THN.

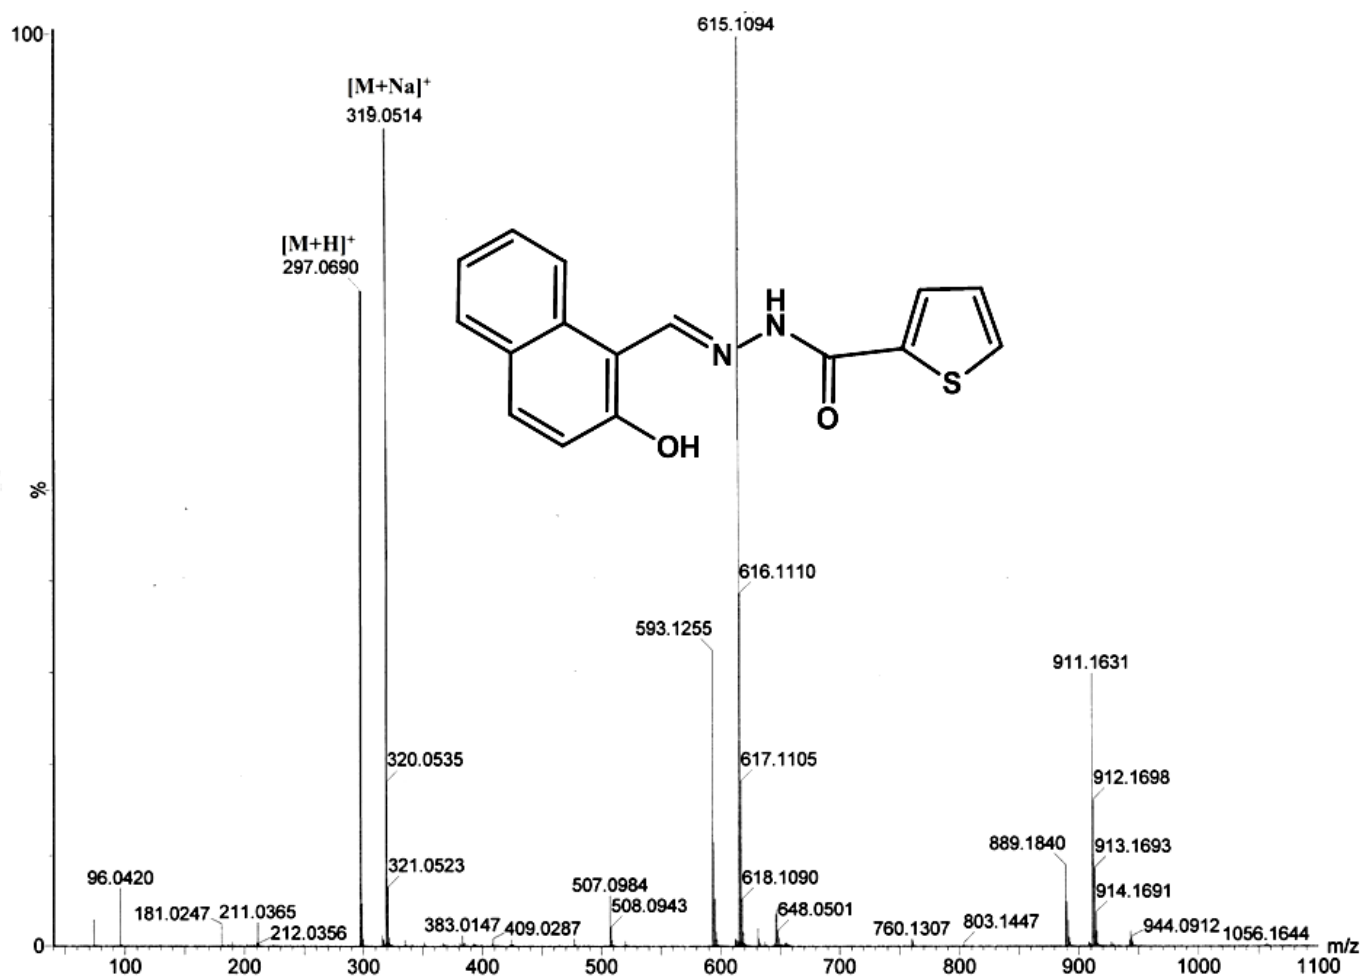

Electronic Supplementary Material (ESI) for RSC Advances  
This journal is © The Royal Society of Chemistry 2013

**Figure 5:** Effect of addition of various metal ions (1 equivalent) on the UV-visible spectra of 20  $\mu\text{M}$  EtOH–H<sub>2</sub>O (1: 4 v/v) solution of THN.

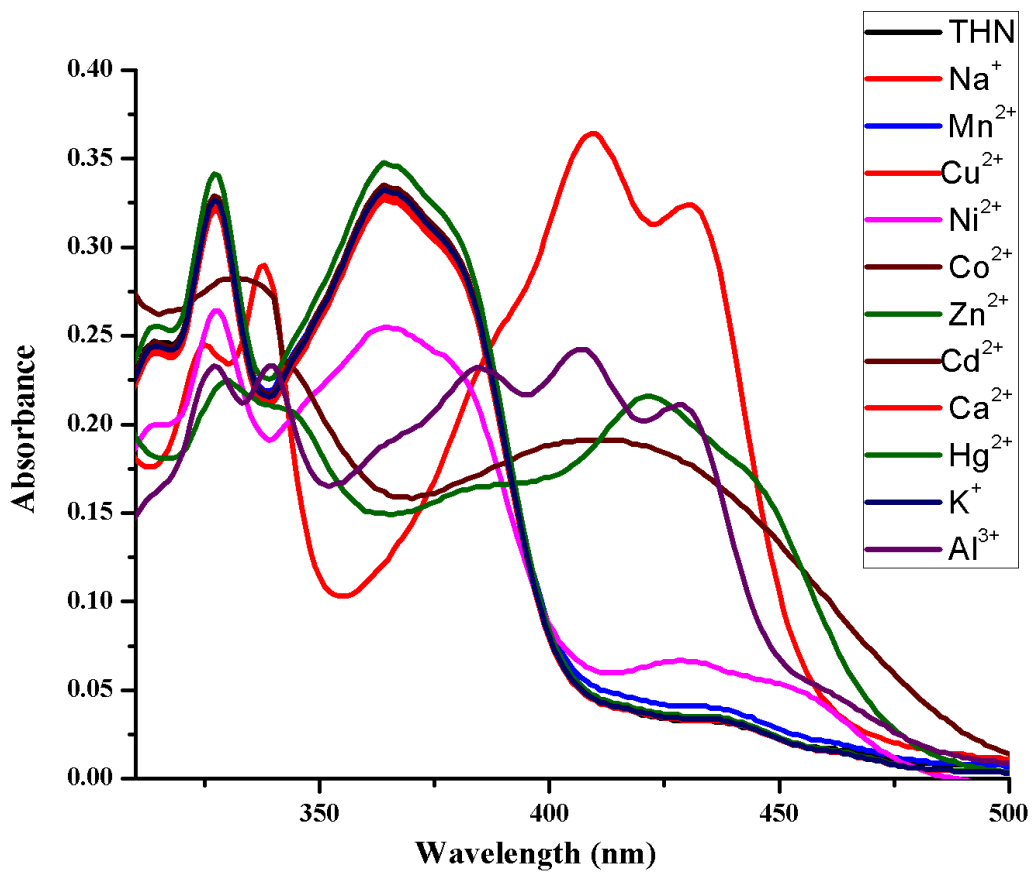

Electronic Supplementary Material (ESI) for RSC Advances  
This journal is © The Royal Society of Chemistry 2013

**Figure 6:** Colorimetric change in receptor THN upon addition of 2 equivalents of  $\text{Al}^{3+}$  in EtOH– $\text{H}_2\text{O}$  (1: 4 v/v) solution.

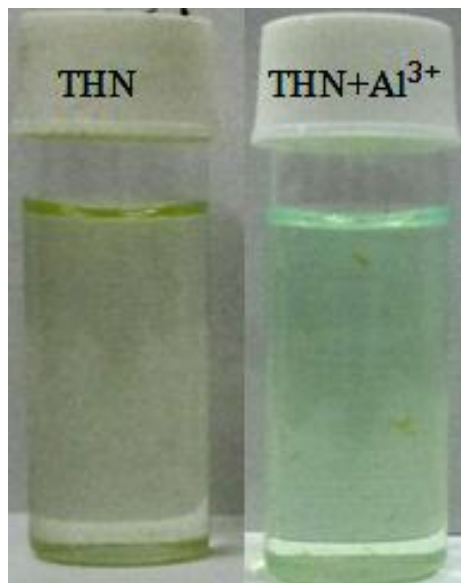

Electronic Supplementary Material (ESI) for RSC Advances  
This journal is © The Royal Society of Chemistry 2013

**Figure 7:** Bensei-Hildebrand plot for THN with  $\text{Al}^{3+}$ , considering the 1:1 complexation. The goodness of the fit is shown by the  $R^2$  value.

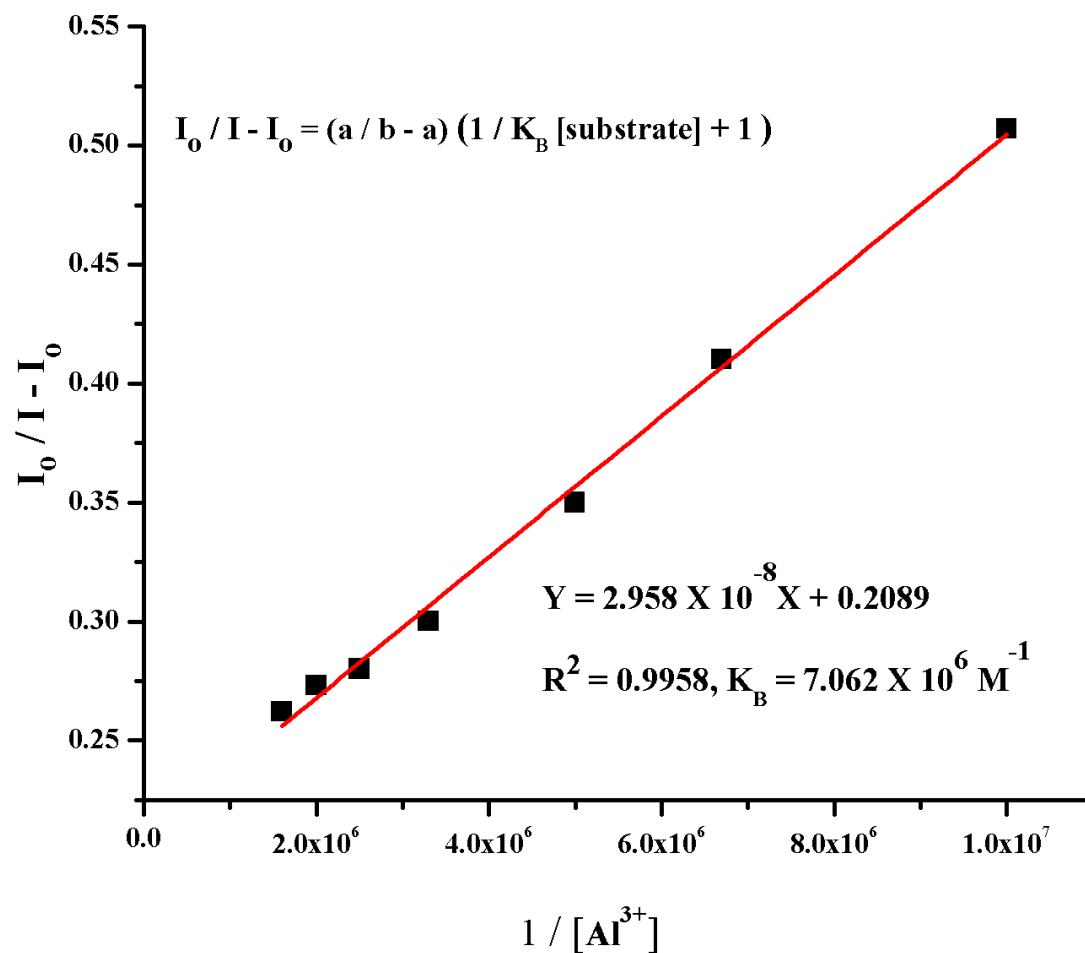

Electronic Supplementary Material (ESI) for RSC Advances  
This journal is © The Royal Society of Chemistry 2013

**Figure 8:** Fluorescence intensity at 476 nm for THN (0.5  $\mu\text{M}$ ) in EtOH–H<sub>2</sub>O (1: 4 v/v) solution as a function of the concentration of Al<sup>3+</sup>. The excitation wavelength for the complex was 407 nm ( $R^2 = 0.9703$ , linear range =  $9.9 \times 10^{-9}$ – $1.98 \times 10^{-7}$ ).

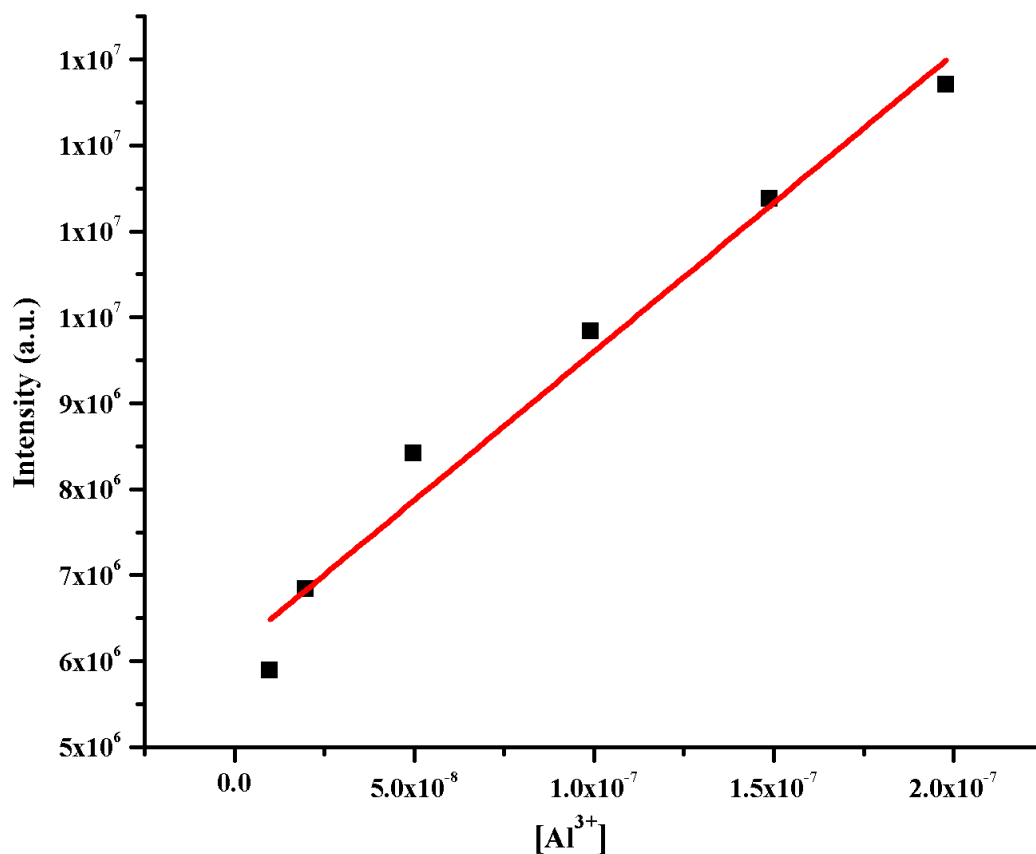



Electronic Supplementary Material (ESI) for RSC Advances  
This journal is © The Royal Society of Chemistry 2013

**Figure 9:** IR spectra of THN- $\text{Al}^{3+}$  complex.

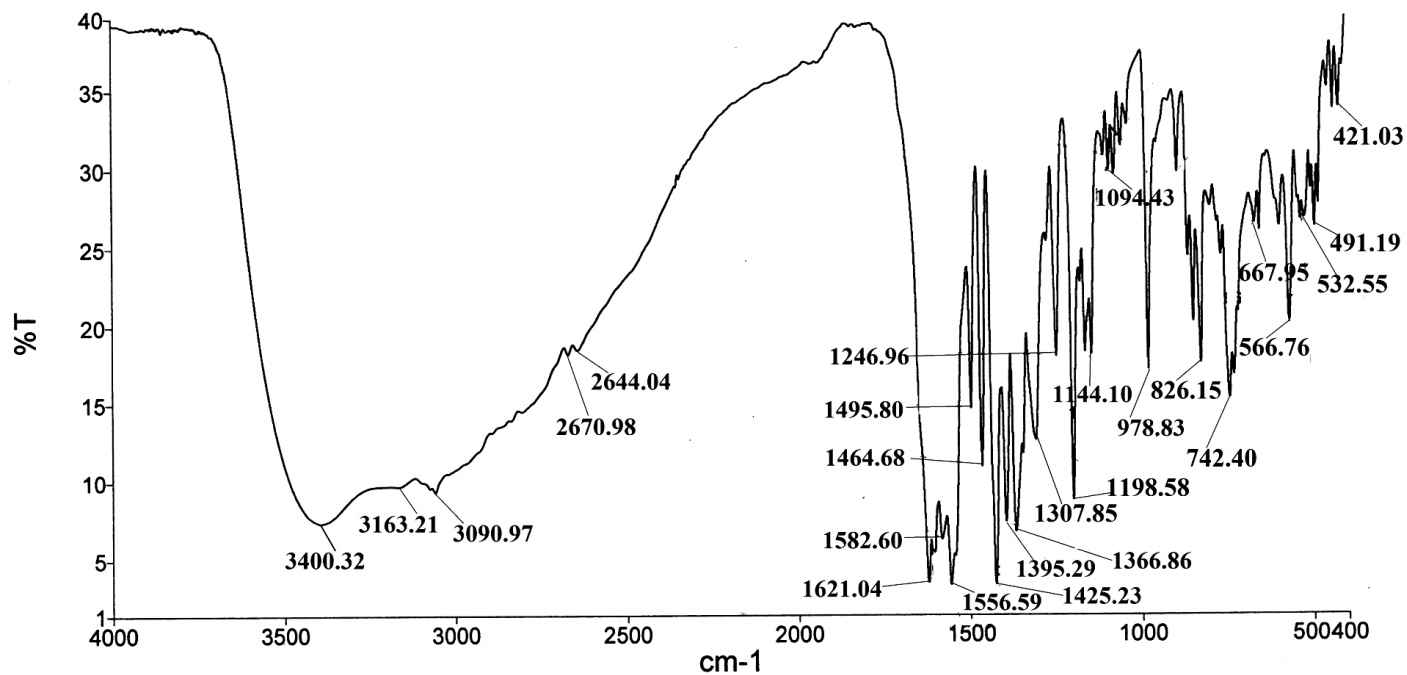

Electronic Supplementary Material (ESI) for RSC Advances  
This journal is © The Royal Society of Chemistry 2013

**Figure 10:** Mass spectra of THN- $\text{Al}^{3+}$  complex.

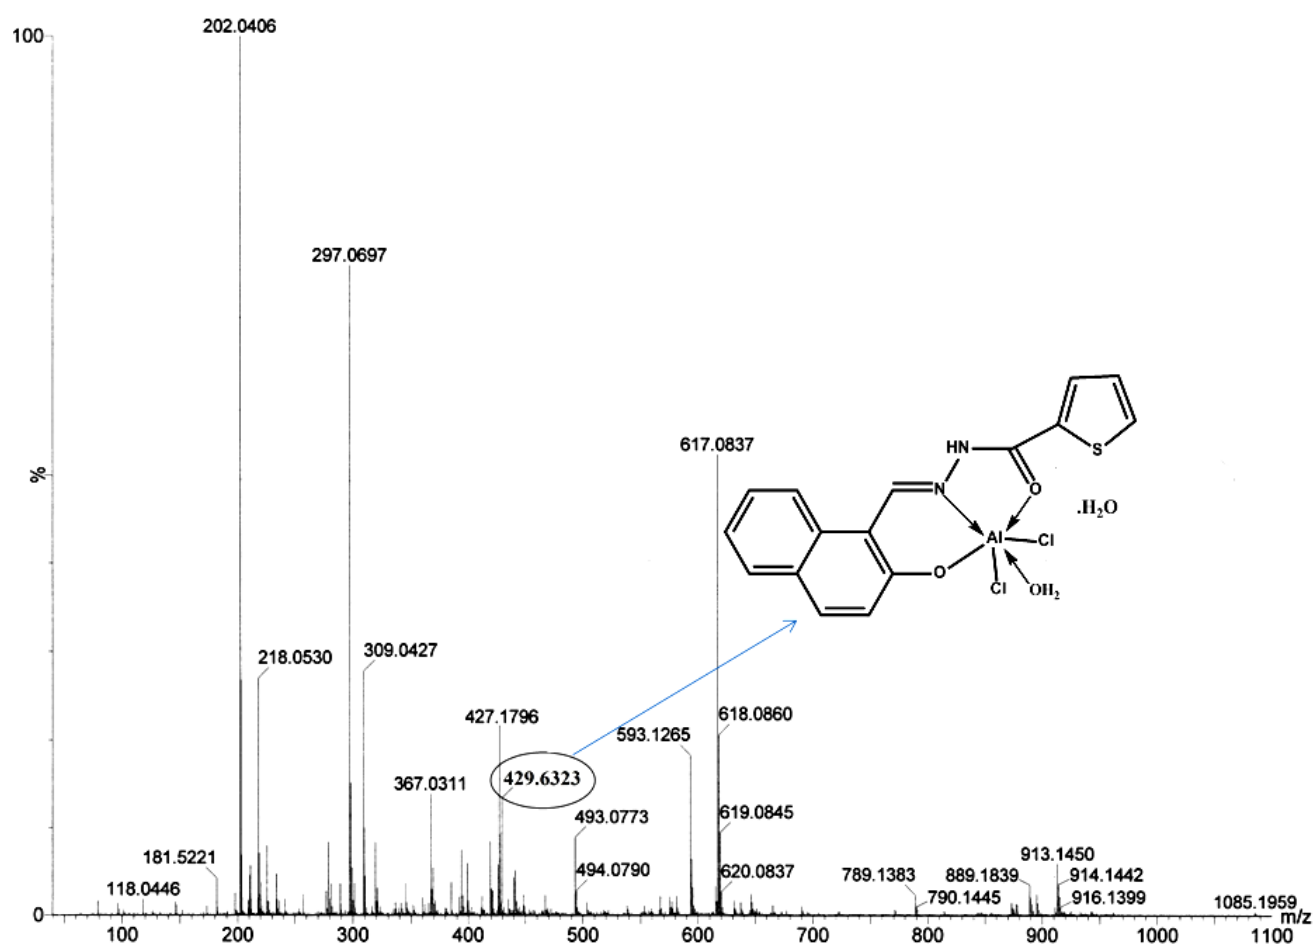

Supplement: c3ra41573b.pdf [file c3ra41573b.pdf]
